# Supplementary material for: Discovering candidate imprinted genes and imprinting control regions in the human genome
Source: PubMed Central journal article supplement (PMC7262774; doi:10.1186/s12864-020-6688-8), 2020-05-31

## Supplemental Figures

**Fig. S1.** A candidate ICR for *PRDM8*. Large scale experimental studies listed *PRDM8* as a candidate imprinted gene [15]. Due to its vicinity to a robust density peak, my strategy also predicts that *PRDM8* is potential imprinted gene.

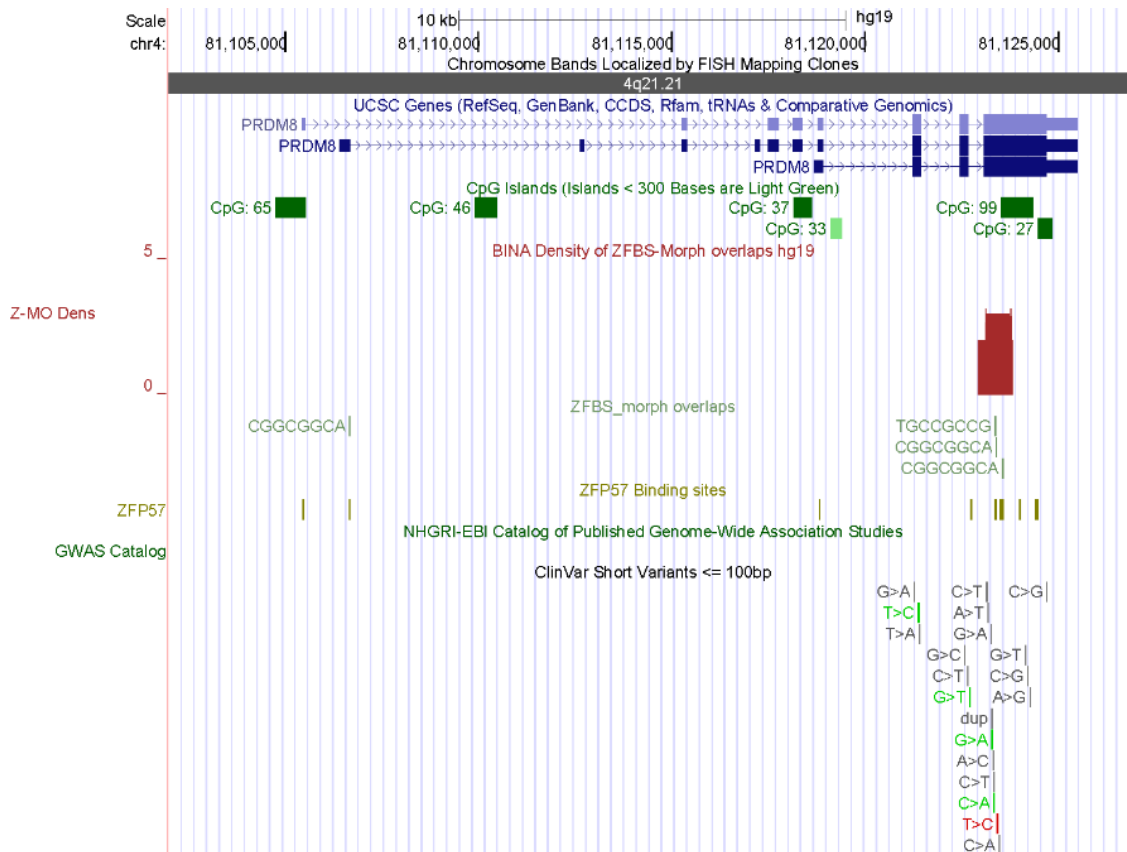

Next page



**Fig. S3.** A density peak in the vicinity of *WDR60*. Results of large-scale experimental studies listed *WDR60* as a candidate imprinted gene [15]. within *WDR60*, I noticed a peak covering 2 ZFBS-morph overlaps. This peak could be a false or a true-positive. If false-positive, then another peak -far upstream of (*WDR60*)- could be a candidate ICR for regulating parent-of-origin specific expression of both *WDR60* and *ESYT2*. The latter gene encodes a protein (synaptotagmin-like protein 2) that belongs to a family of membranous Ca<sup>2+</sup>-sensors .

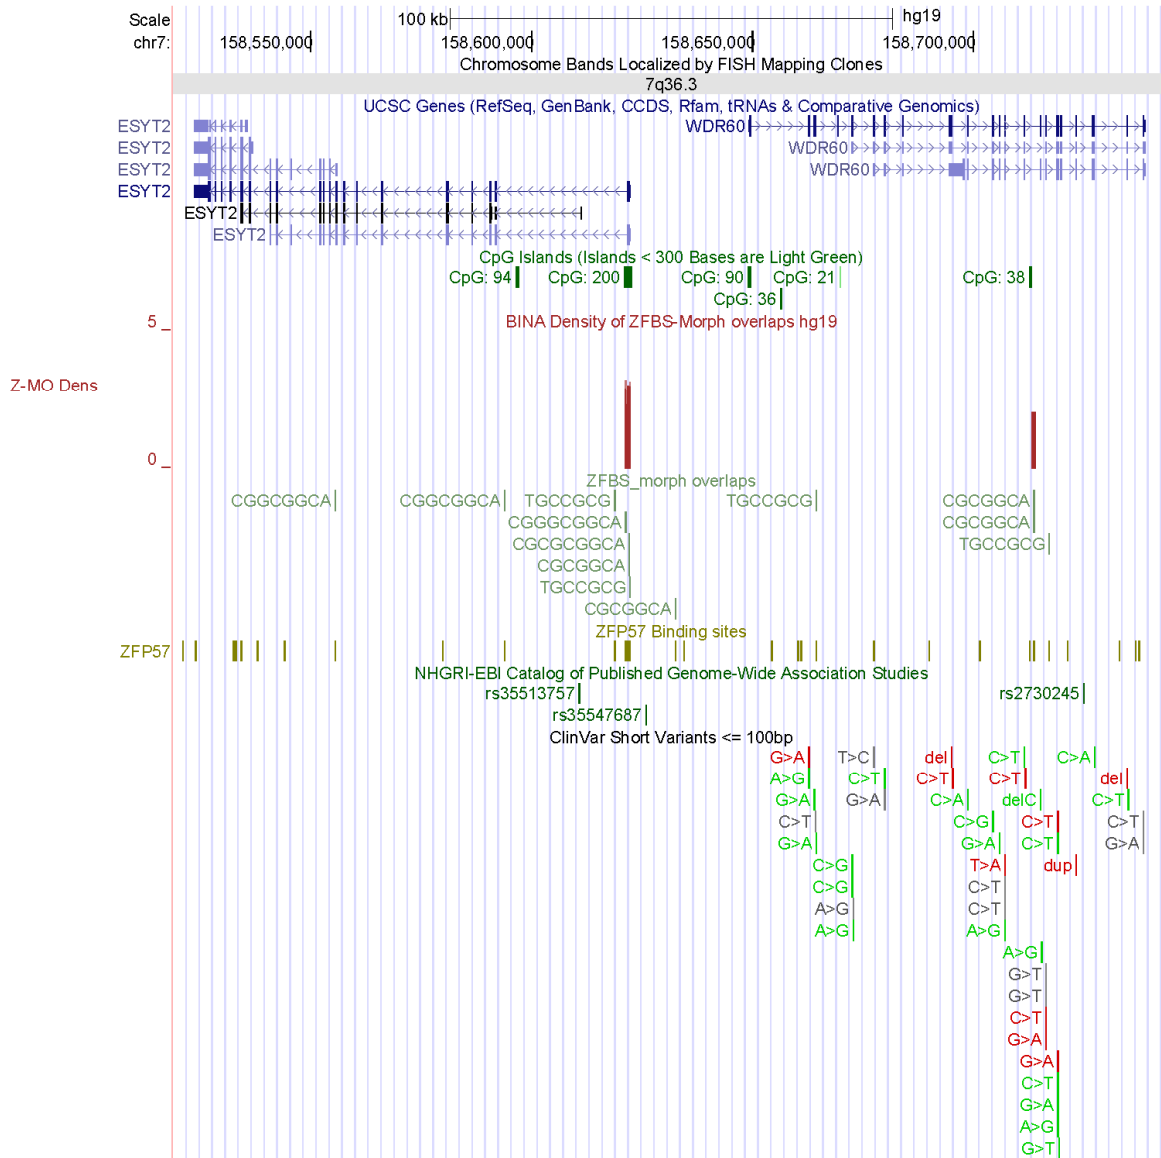

**Fig. S4.** The positions of density peaks with respect to the ICR of *H19 – IGF2* imprinted domain. In a few cases, an ICR encompasses two density peaks. The figure below includes a track displaying “Updated CTCF Binding sites predictions”. See references [25, 26] for updated positions of the unique repeats and CTCF sites upstream of *H19* TSS. Results of the ENCODE ChIPs do not support the existence of the predicted CTCF site 5 described previously [24]. Furthermore, in results of ChIPs displayed at the UCSC genome browser, I noticed a chromatin boundary consisting of CTCF, RAD21, and SMC3 in a CpG island upstream of *H19* TSS [25]. I named the predicted site in that island CTCF site 8.

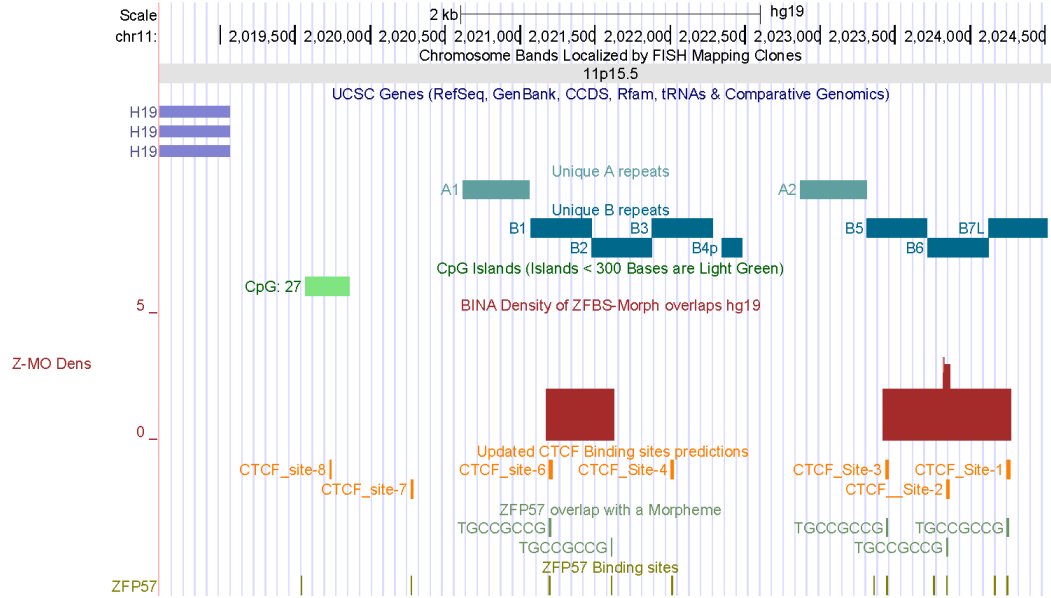

**Fig. S5.** A peak in the density plots correctly locating the KvDMR in the *KCNQ1* imprinted domain.

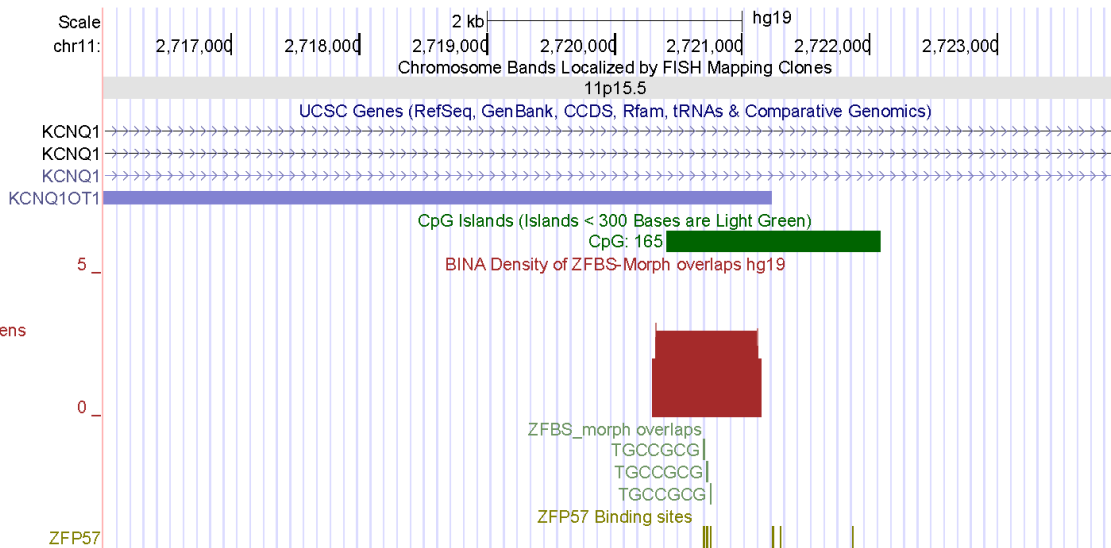

**Fig. S6.** A candidate ICR for a potential imprinted gene (*CITED2*). This gene encodes a regulator of transcription. Absence of *Cited2* in mouse embryos caused congenital heart disease by perturbing left-right patterning of the body axis [31]. Deleterious mutations in *CITED2* cause VSD2 –ventricular septal defect 2 [75].

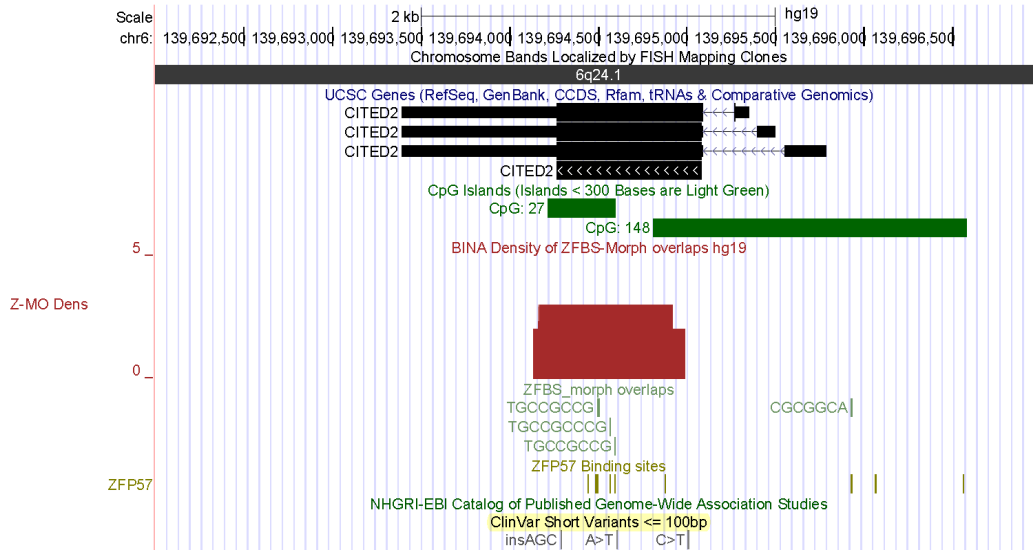

**Fig. S7.** A candidate ICR for a potential imprinted gene (*FUCA2*). Note the position of the candidate ICR with respect to the SNP (rs72992630) and primers used to deduce that *FUCA2* is biallelically expressed gene [19]. The SNP and primers are not in the vicinity of the 1<sup>st</sup> exon of the transcript that is associated with a candidate ICR.

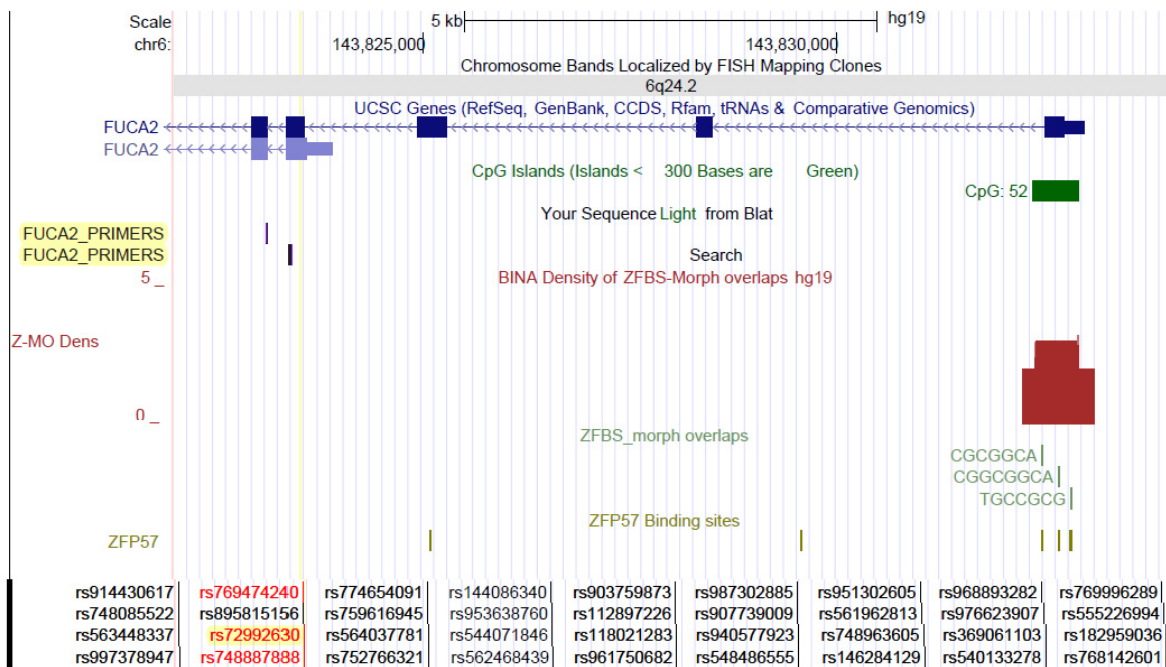

**Fig. S8.** A candidate ICR for a potential imprinted gene (*SAMD5*). A study found that *SAMD5* was overexpressed in prostate cancer and had powerful prognostic ability for predicting post-operative biochemical recurrence after radical prostatectomy [33].

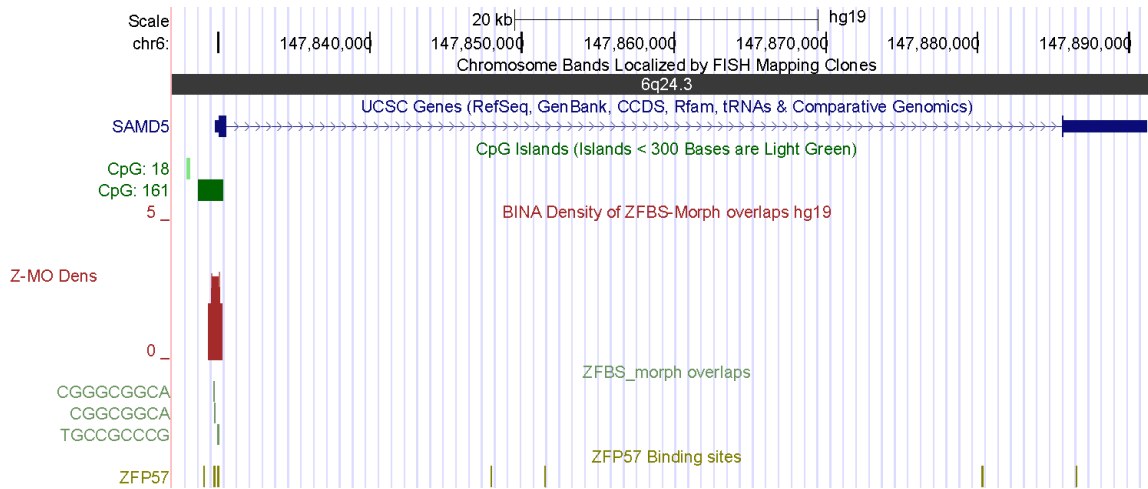

**Fig. S9.** A density peak predicted a candidate ICR for a potential imprinted gene (*ZBTB2*). In mouse embryonic stem cells, *ZBTB2* dynamically interacted with nonmethylated CpG island promoters and regulated differentiation [35]. In colorectal cancer, the abnormal forms of *ZBTB2* increased cell proliferation [36].

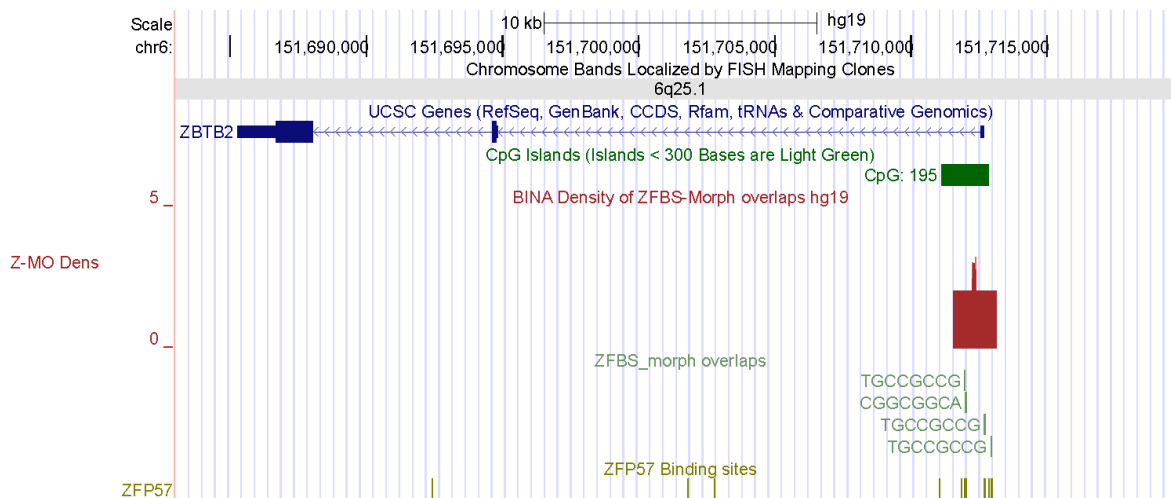

**Fig. S10.** Density peaks mapping to known parent-of-origin specific transcripts. One peak correctly located the ICR at the *MEST* locus. This ICR is intragenic and encompasses the TSSs of *MESTIT1* (a noncoding RNA gene) and a subset of *MEST* transcripts. *KLF14* is a known imprinted gene [30]. Density-plots predicted a candidate ICR regulating its imprinted expression.

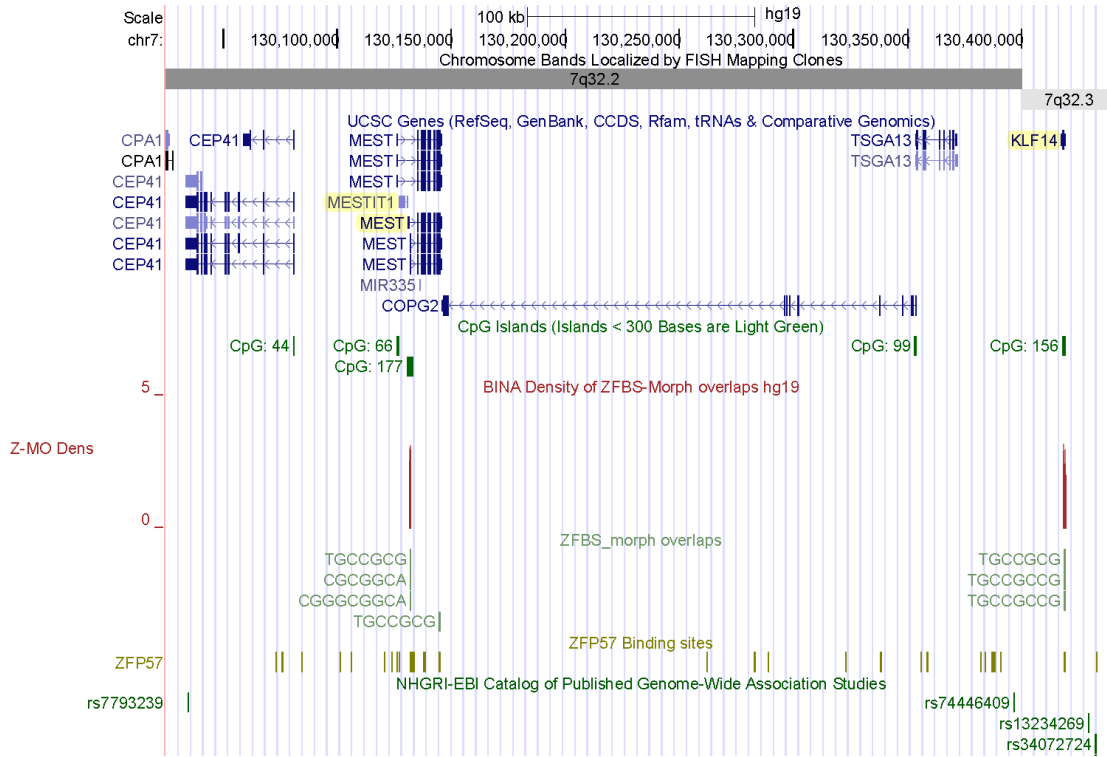

**Fig. S11.** In density-plots, a peak correctly located the ICR regulating the expression of *INPP5\_v2*.

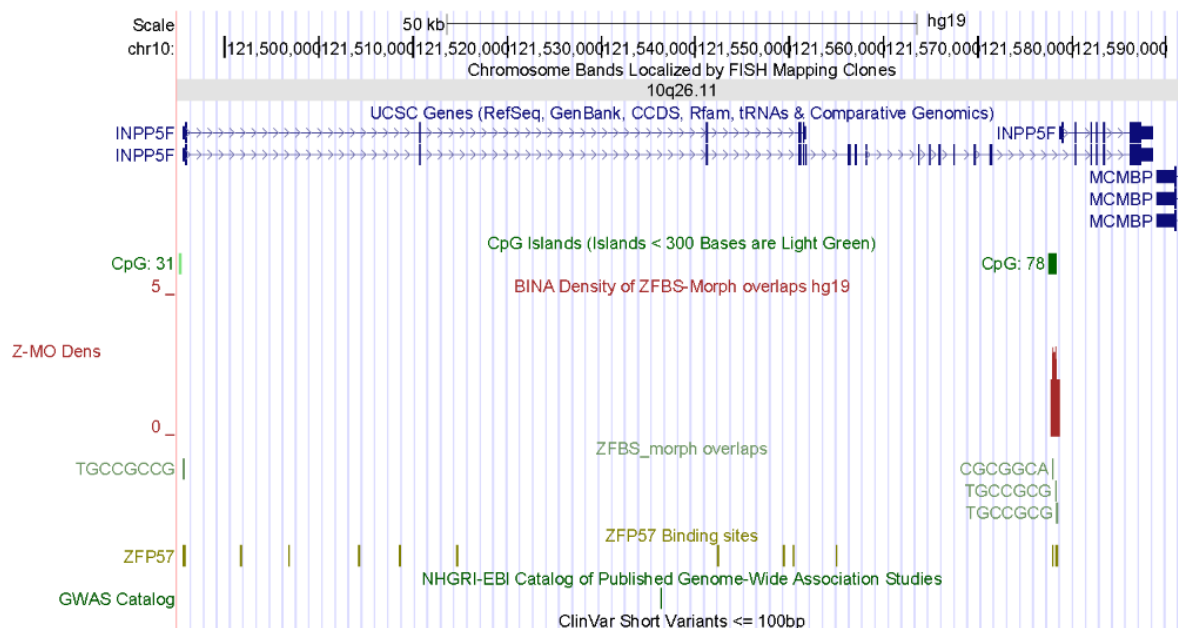

Supplement: 12864_2020_6688_MOESM1_ESM.pdf [file 12864_2020_6688_MOESM1_ESM.pdf]
